# Supplementary material for: Evaluating the Safety of Potential Probiotic Enterococcus durans KLDS6.0930 Using Whole Genome Sequencing and Oral Toxicity Study
Source: PubMed Central journal article supplement (PMC6110905; doi:10.3389/fmicb.2018.01943), 2018-08-21
Supplement: Image_1.pdf [file Image_1.pdf]

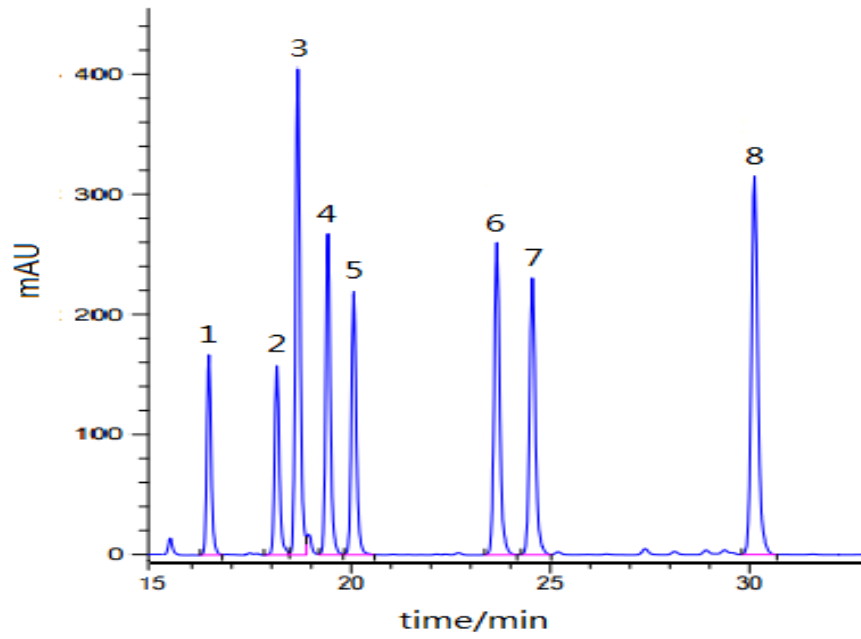

**Figure S1.** Typical HPLC chromatograms of biogenic amines in standard solution  
1, tryptamine; 2, phenylethylamine; 3, putrescine; 4, cadaverine; 5, histamine; 6, tyramine; 7, spermidine; 8, spermine.

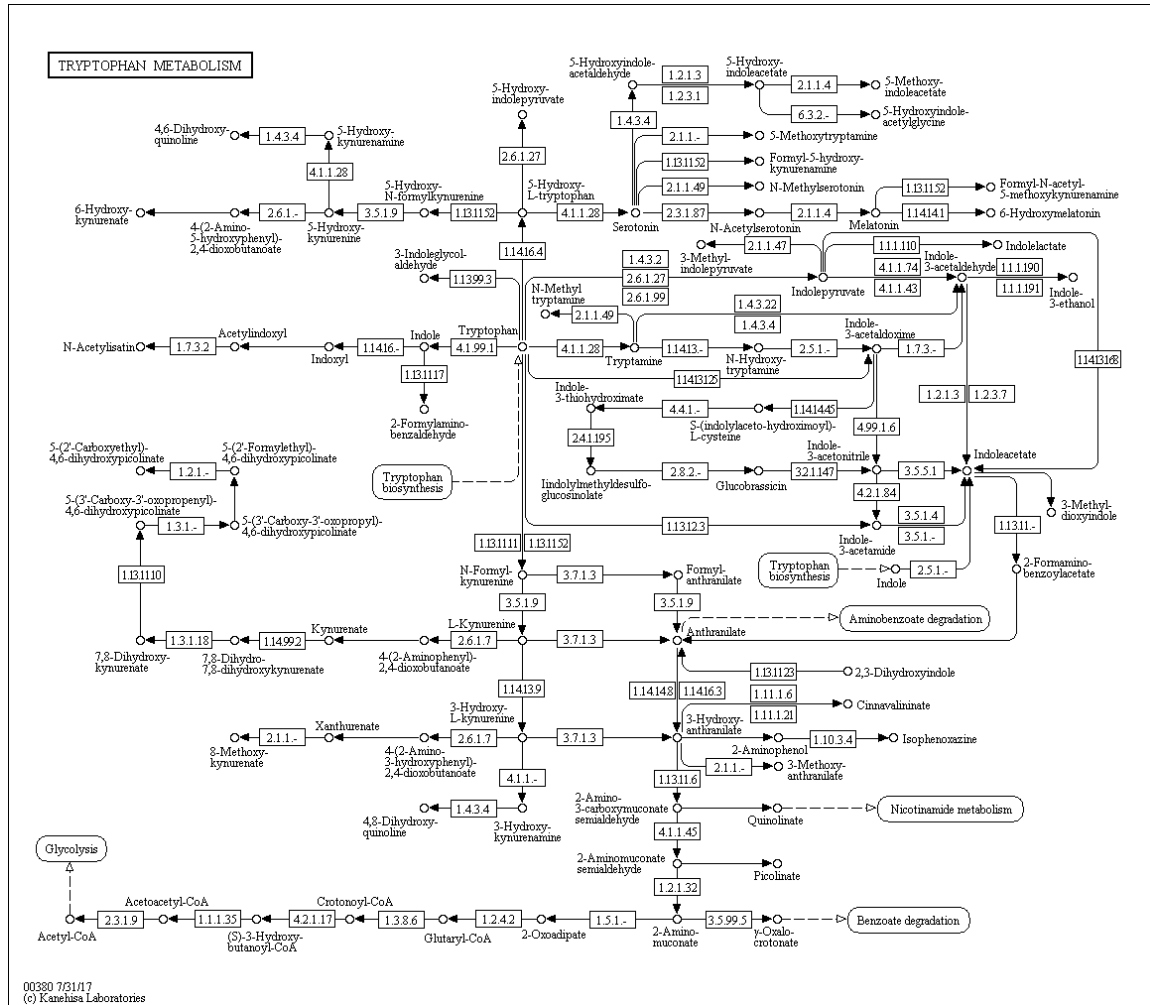

**Figure S2.** The pathway of tryptophan metabolism and indole biosynthesis by *Enterococcus durans* KLDS6.0930

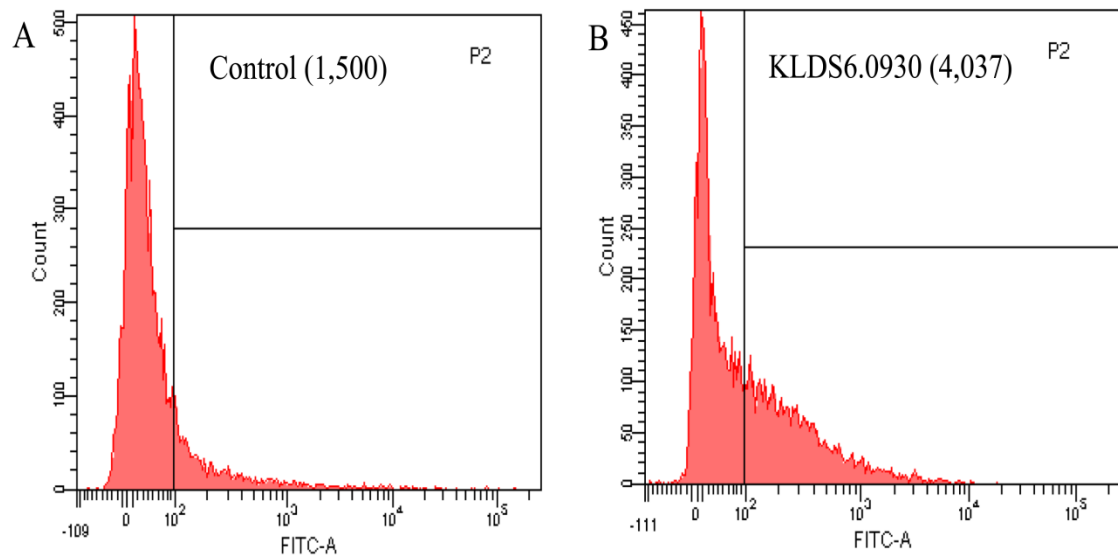

**Figure S3.** Representative flow cytometry images of *Enterococcus durans* KLDS6.0930 labeled with carboxyfluorescein diacetate succinimidyl ester (cFDA-SE) in the cecum of rats after administration for 1 day. Control, 1 mL of sterile normal saline normal; KLDS6.0930,  $2 \times 10^8$  CFU *E. durans* KLDS6.0930 labeled with cFDA-SE in 1 mL of sterile normal saline.
